# Supplementary material for: An intrinsic mechanism controls reactivation of neural stem cells by spindle matrix proteins
Source: PubMed Central journal article supplement (PMC5526931; doi:10.1038/s41467-017-00172-9), 2017-07-25
Supplement: 41467_2017_172_MOESM1_ESM.pdf [file 41467_2017_172_MOESM1_ESM.pdf]

File Name: Supplementary Information

Description: Supplementary Figures and Supplementary Table.

File Name: Supplementary Data 1

Description: Identification of putative Chro-binding sites in the whole genome within neural stem cells by cell type-specific *in vivo* profiling.

Supplementary Figure 1

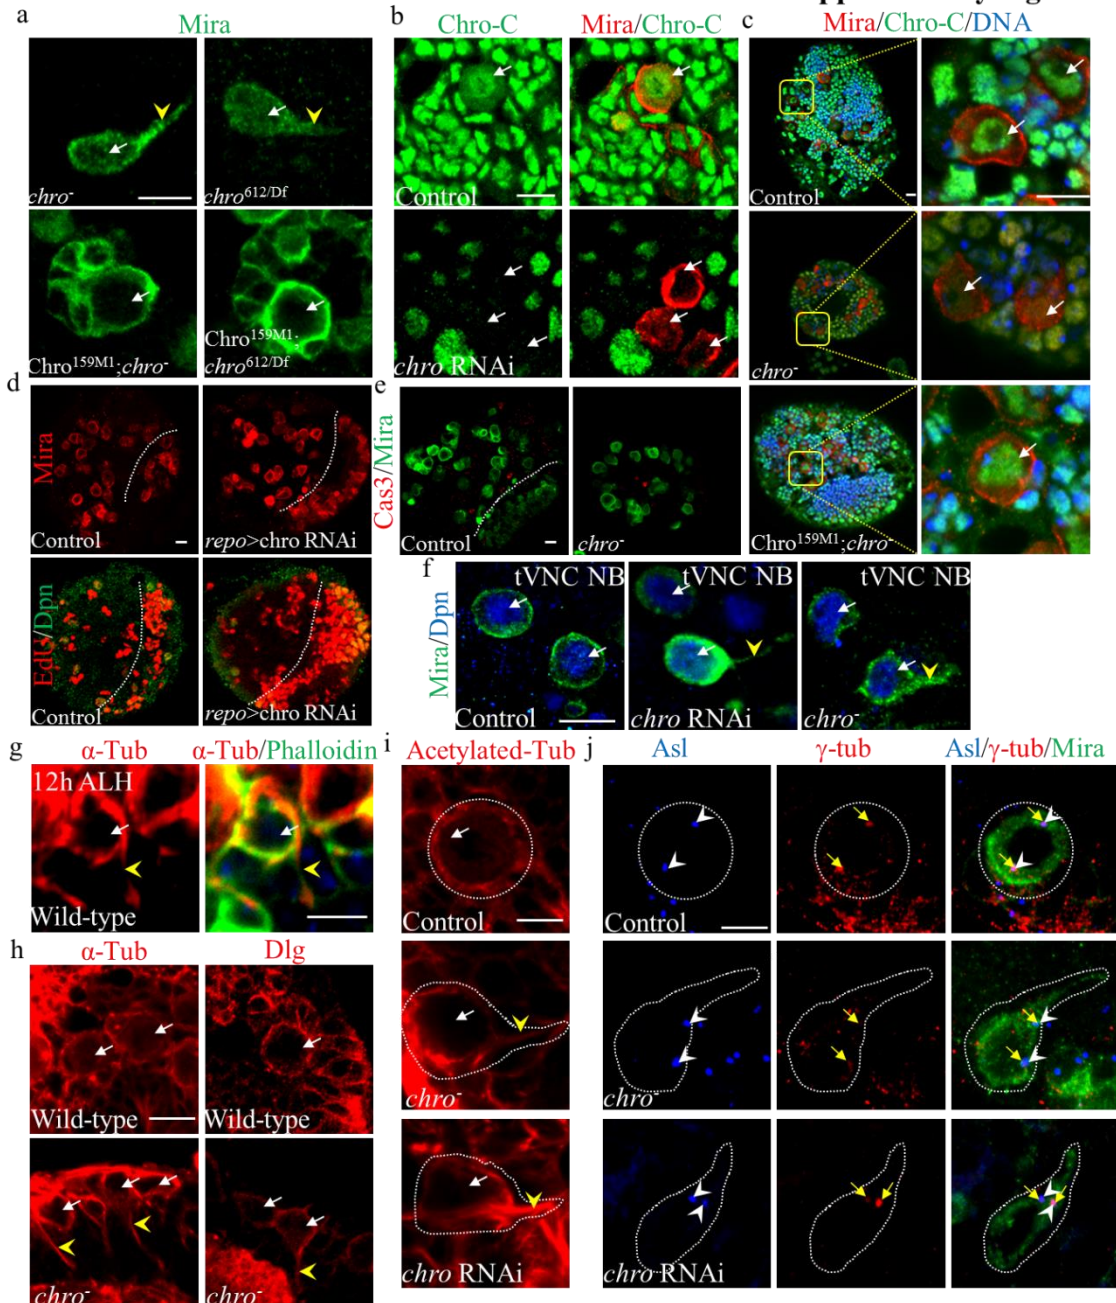

**Supplementary Figure 1. Chro regulates NSC reactivation.** (a) BAC clone CH322-159M1 containing genomic DNA encompassing wild-type *chro* and its promoter region (*Chro*<sup>159M1</sup>) was introduced into *chro*<sup>17/612</sup>(*chro*<sup>-</sup>) or *chro*<sup>612/Df</sup>(3L)ED231(*chro*<sup>612/Df</sup>) mutant background. Mira was labelled in *chro*<sup>-</sup>, *Chro*<sup>159M1</sup>; *chro*<sup>-</sup>, *chro*<sup>612/Df</sup> and *Chro*<sup>159M1</sup>; *chro*<sup>612/Df</sup> neural stem cells (NSCs). (b) Mira and Chro-C were labelled in control and *chro* RNAi knockdown NSCs. (c) Mira, Chro-C

and ToPro-3 (for DNA) were labelled for control, *chro*<sup>-</sup> and *Chro*<sup>159M1</sup>; *chro*<sup>-</sup> larval brains. The right panels are the enlarged view of the yellow boxes in left panels. **(d)** Mira or EdU and Dpn were labelled for larval brains from control and *chro* RNAi knockdown under *repo*-Gal4. **(e)** Larval brains of control and *chro*<sup>-</sup> were labeled with active caspase 3 (Cas-3) and Mira. The central brain is to the left of the white dotted line in D and E. **(f)** Dpn and Mira were labelled in VNC NSCs of control, *chro* RNAi knockdown and *chro*<sup>-</sup> mutant. **(g)** NSCs in wild-type were labelled with  $\alpha$ -tubulin ( $\alpha$ -Tub) and Phalloidin at 12h ALH. **(h)** Control and *chro*<sup>-</sup> mutant NSCs were labelled with  $\alpha$ -Tub or Discs large (Dlg) at 96h ALH. **(i)** Control, *chro*<sup>-</sup> mutant and *chro* RNAi knockdown NSCs were labelled with Acetylated-tubulin (Acetylated-Tub). **(j)** Asterless (Asl),  $\gamma$ -tubulin ( $\gamma$ -tub) and Mira were labelled in NSCs from control, *chro*<sup>-</sup> mutant and *chro* RNAi knockdown. NSCs with Mira<sup>+</sup> cellular extensions containing an Asl<sup>+</sup> centriole within or in close proximity to the cellular protrusions: control, 0%, n=110; *chro*<sup>-</sup>, 64%, n=72; *chro* RNAi, 68%, n=75. White arrowheads indicated Asl<sup>+</sup> centrioles and yellow arrows indicated  $\gamma$ -tub<sup>+</sup> staining. NSCs were outlined by white dotted lines in i and j. White arrows indicated NSCs in a-c and f-i, and yellow arrowheads indicated the cellular extension of NSCs in a, f-i. Scale bars, 10  $\mu$ m.

## Supplementary Figure 2

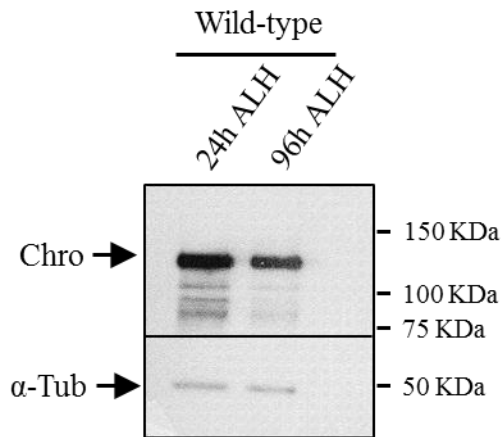

### Supplementary Figure 2. Chro protein levels at 24h ALH and 96h ALH in larval brains.

Protein extracts from wild-type larval brains at 24h ALH and 96 ALH were probed by anti-Chro-C and anti- $\alpha$ -tubulin antibodies in western blotting. After normalization and quantification in image J, the Chro levels in wild-type larval brains at 24h ALH were 1.1 times of those at 96h ALH.

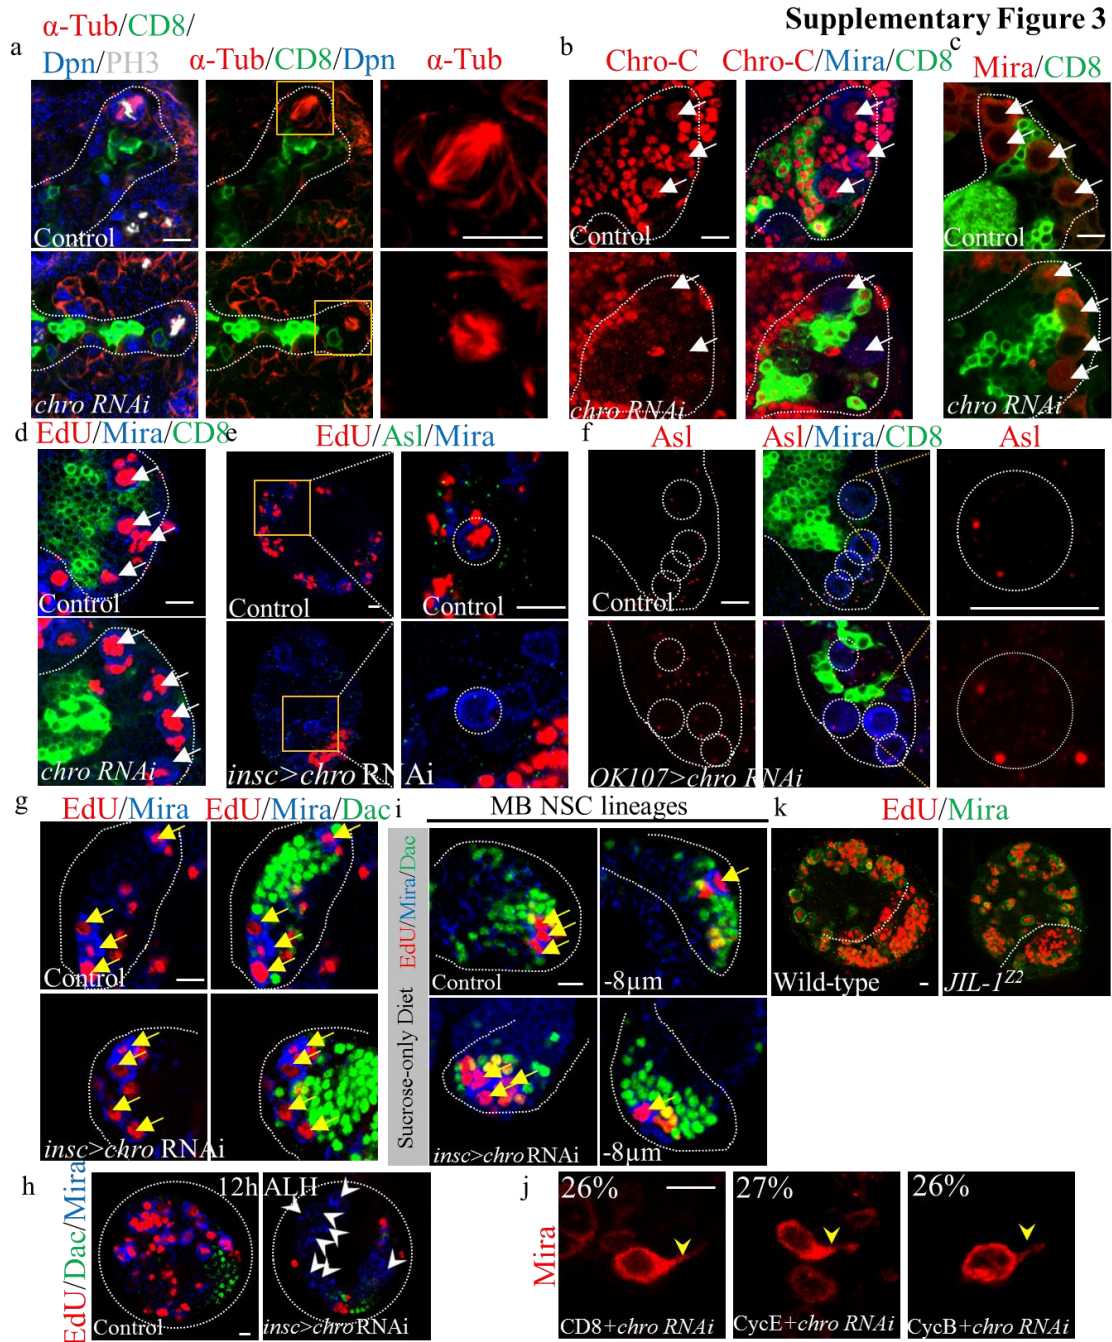

**Supplementary Figure 3. Chro depletion does not obviously affect NSC proliferation in Mushroom body neuroblasts.** (a) Dpn,  $\alpha$ -tubulin, Phospho-Histone H3 (PH3) and CD8 were stained in control (additional UAS-CD8-GFP) and *chro* RNAi driven by Mushroom body (MB) specific driver OK107-Gal4 with UAS-CD8-GFP. The right panels are enlarged view of the yellow boxes in middle panels. (b) Chro-C, Mira and CD8 were labelled in control (additional

UAS-CD8-GFP) and *chro* RNAi driven by OK107-Gal4 with UAS-CD8-GFP. **(c-d)** Mira and CD8 **(c)** or Mira, EdU and CD8 **(d)** were labelled in control (additional UAS-CD8-GFP) and *chro* RNAi driven by OK107-Gal4 with UAS-CD8-GFP. **(e)** EdU, Asl and Mira were labelled in control (additional UAS-CD8-GFP) and *chro* RNAi NSCs driven by *insc*-Gal4. The middle and right panels are enlarged view of the yellow boxes in left panels. NSCs were outlined by white dotted lines. **(f)** MB NSCs from control (additional UAS-CD8-GFP) and *chro* RNAi driven by OK107-Gal4 with UAS-CD8-GFP were stained with Asl, Mira and CD8. MB neuroblast lineages were outlined by white dotted lines. The right panels are enlarged view of the MB neuroblasts in middle panels. **(g-h)** NB NSC lineages at 12h ALH were labelled by EdU, Mira and Dachshund (Dac) in control (UAS-CD8-GFP) and *chro* RNAi driven by *insc*-Gal4. Yellow arrows in **g** pointed MB NSCs in the lineage. White arrow heads in **h** indicate non-MB NSCs which failed to be incorporated with EdU. **(i)** Larval brains from control (UAS-CD8-GFP) and *chro* RNAi driven by *insc*-Gal4 were raised on sucrose-only (amino acid-free) food supplemented with EdU for 36h at 29 °C. MB NSCs lineages were labelled with EdU, Mira and Dac. Yellow arrows pointed MB NSCs in the lineage. **(j)** NSCs from *chro* RNAi with UAS-CD8, *chro* RNAi with UAS-CycE and *chro* RNAi with CycB were driven by *insc*-Gal4 and labelled by Mira. **(k)** Larval brains from wild-type and *Jil-1<sup>ZZ</sup>* mutant were labelled with EdU and Mira. MB neuroblast lineages were outlined by white dotted lines in a-d, f-g and i. MB neuroblasts were pointed by white arrows in b-d. Scale bars: 10 µm.

**Supplementary Figure 4**  
72h ALH

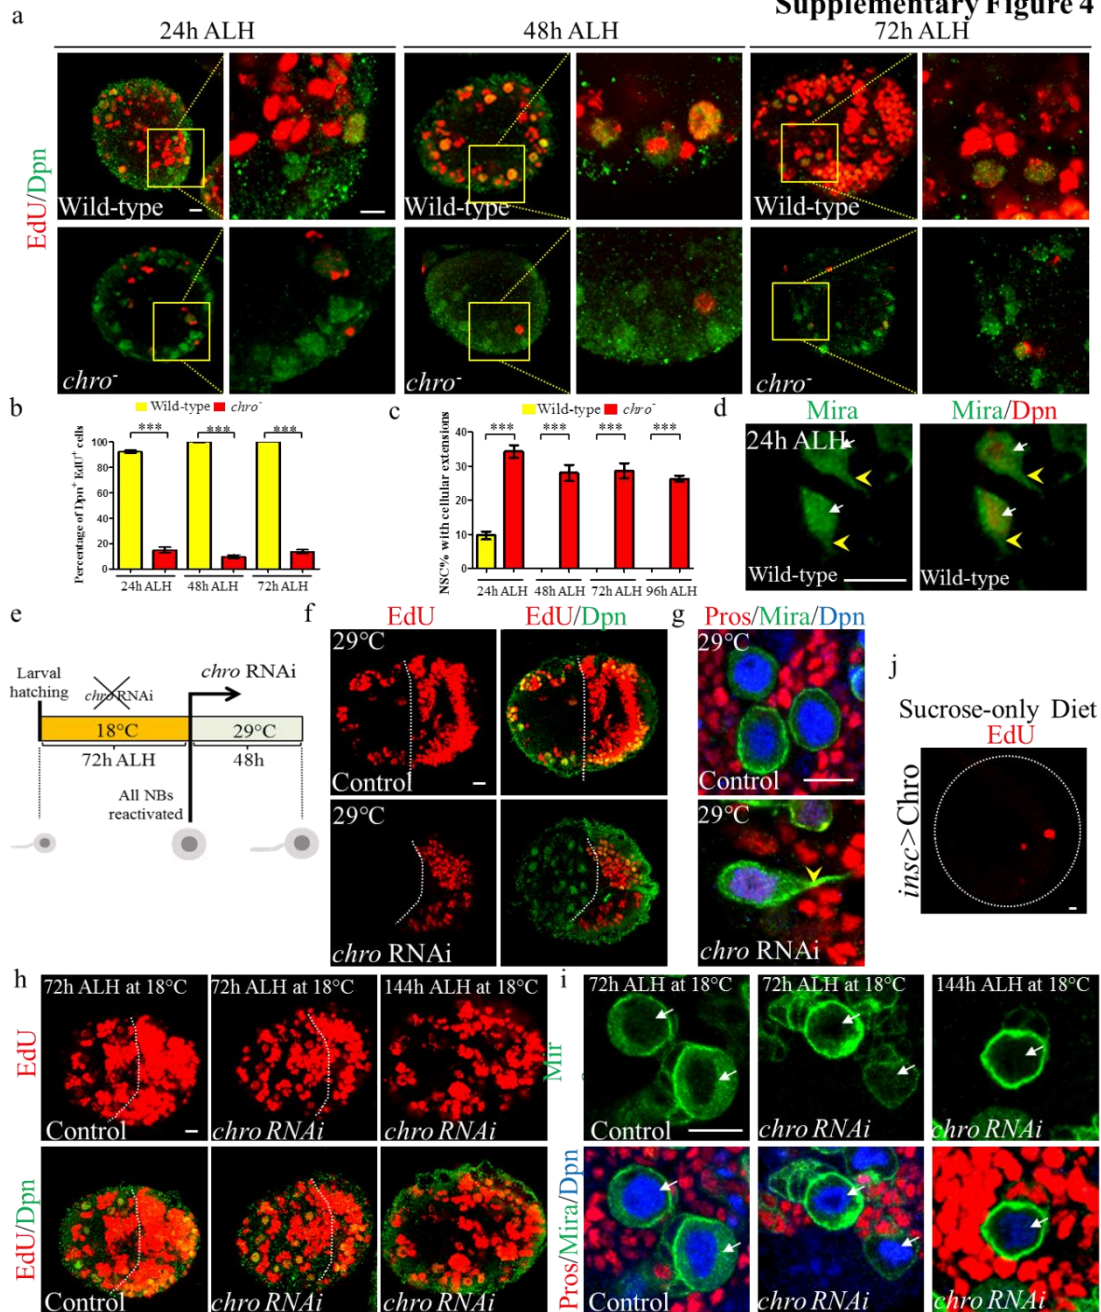

**Supplementary Figure 4. Chro is important for the initiation and maintenance of NSC reactivation.** (a) EdU and Dpn were labelled in wild-type and *chro*<sup>-</sup> mutant larval brains at 24h ALH, 48h ALH or 72h ALH. The right panels are the enlarged view of the yellow boxes in left panels. (b) Quantification of Dpn<sup>+</sup> EdU<sup>+</sup> cells in wild-type and *chro*<sup>-</sup> mutant central brains. Wild-type, 24h ALH, 92%, n=992; *chro*<sup>-</sup>, 24h ALH, 15%, n=671; wild-type, 48h ALH, 100%, n=1353;

*chro*<sup>-</sup>, 48h ALH, 10%, n=390; wild-type, 72h ALH, 100%, n=1152; *chro*<sup>-</sup>, 72h ALH, 14%, n=408. (c) Quantification of NSCs with cellular extensions in control and *chro*<sup>-</sup> mutant. Wild-type, 24h ALH, 10%, n=134; *chro*<sup>-</sup>, 24h ALH, 35%, n=71; wild-type, 48h ALH, 0%, n=382; *chro*<sup>-</sup>, 48h ALH, 28%, n=128; wild-type, 72h ALH, 0%, n=480; *chro*<sup>-</sup>, 72h ALH, 29%, n=170; wild-type, 96h ALH, 0%, n=249; *chro*<sup>-</sup>, 96h ALH, 26%, n=197. All error bars indicate  $\pm$  s.d. in b and c. \*\*\* indicates  $p < 0.001$  in b, c by student's t-test. (d) Dpn and Mira were labelled for NSCs in wild-type at 24h ALH. (e) A schematic diagram showing the induction of control or *chro* RNAi knockdown at a later larval stage by *insc*-Gal4 under the control of a temperature-sensitive *tub*-Gal80<sup>ts</sup>. (f-g) Hatched larvae from control or *chro* RNAi knockdown were raised at 18°C for 3 days and transferred to 29°C for 2 days. (f) EdU and Dpn or (g) Mira, Pros and Dpn were labelled in control and *chro* RNAi larval brains after 2 days at 29°C. (h-i) Control and *chro* RNAi were kept at 18°C. (h) EdU and Dpn or (i) Mira, Pros and Dpn were labelled in control and *chro* RNAi larval brains at 72h ALH or 144 ALH. (j) Larval brains from *insc*>Chro were raised on sucrose-only (amino acid-free) food for 72h and labelled with EdU. Larval brain lobe was outlined by white dotted lines. The central brain is to the left of the white dotted line in f and h. Arrows indicated NSCs in d, i and arrowheads indicated the cellular extension of NSCs in d, g. Scale bars, 10  $\mu$ m.



Supplementary Figure 5

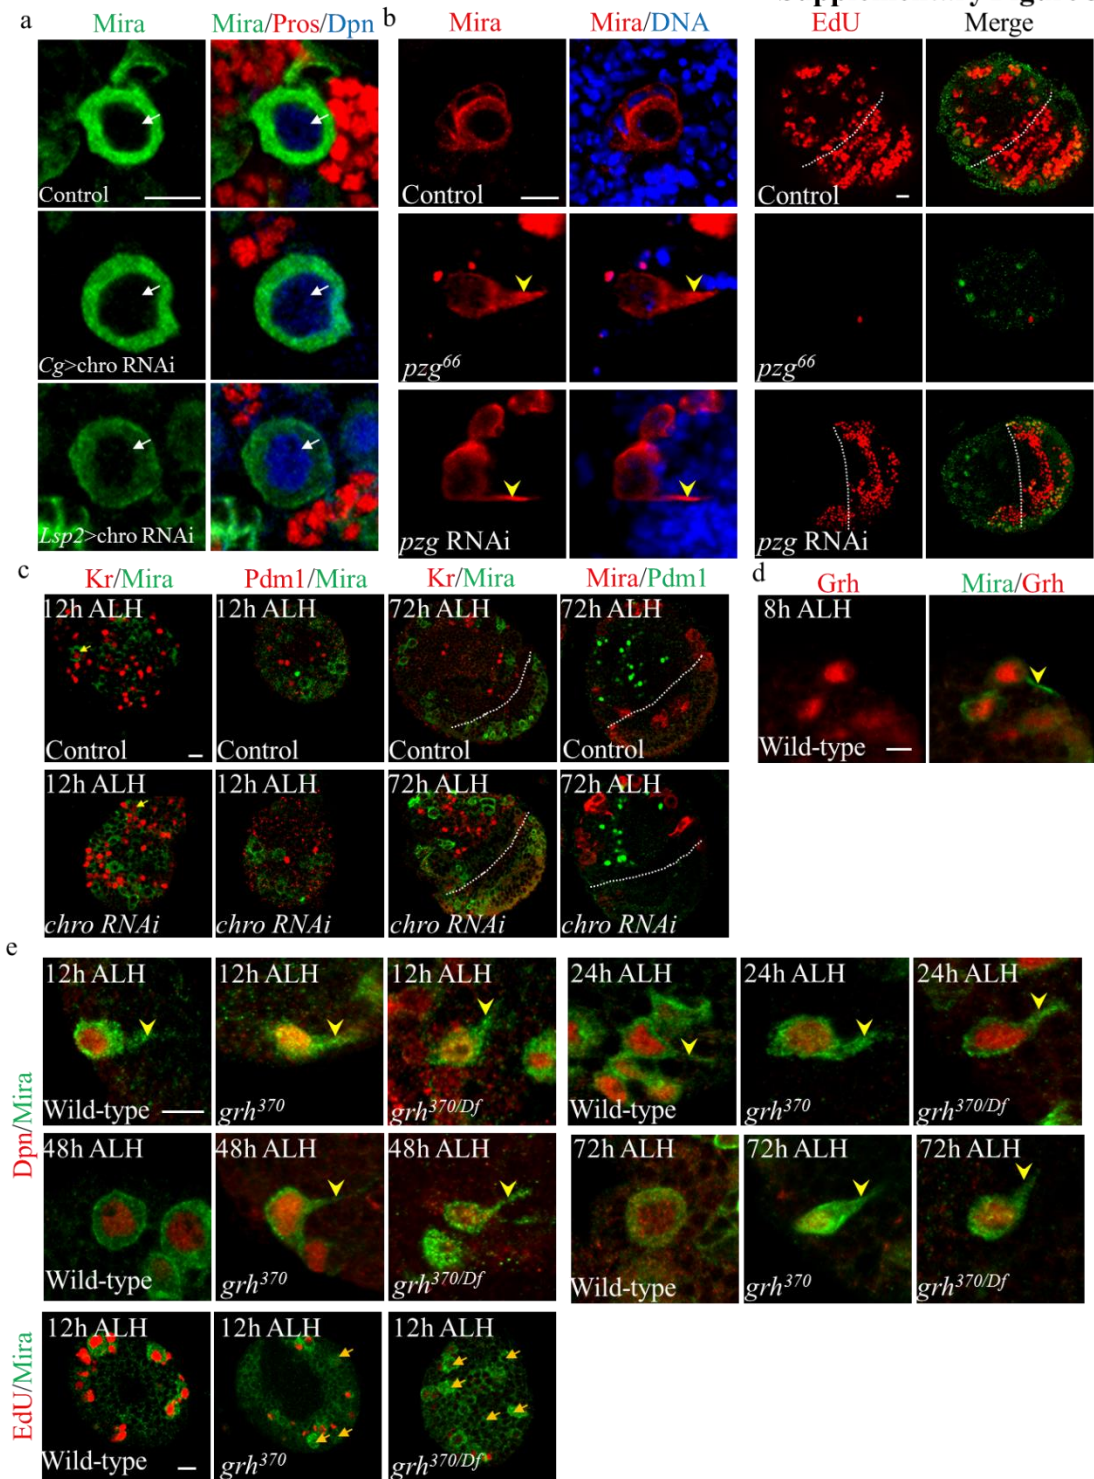

**Supplementary Figure 5. Chromatin insulator protein Pzg regulates the exit of NSCs from quiescence.** (a) NSCs (white arrows) from control, *Cg>chro* RNAi and *Lsp2>chro* RNAi were

labelled with Dpn, Mira and Pros. **(b)** Mira and DNA or EdU and Dpn were labelled for NSCs from control, *pzg*<sup>66</sup> homozygous mutant and *pzg* RNAi driven by *insc*-Gal4. **(c)** Mira and Kruppel (Kr) or Pdm1 were labelled for control and *chro* RNAi knockdown larval brains for 12h ALH or 72h ALH at 29°C. Yellow arrows indicated Mira<sup>+</sup> NSCs with weak Kr expression in control and *chro* RNAi at 12h ALH. At 72h ALH, Kr was undetectable in control or *chro* RNAi. Pdm1 was undetectable in control or *chro* RNAi NSC at 12h ALH and 72h ALH. The central brain is to the left of the white dotted line in b-c. **(d)** Wild-type NSCs at 8h ALH were labelled with Grainyhead (Grh) and Mira. **(e)** Mira and Dpn or EdU and Mira were labelled in wild-type, *grh*<sup>370</sup> and *grh*<sup>370</sup>/Df(2R)PcLB (*grh*<sup>370/Df</sup>) NSCs at 12h, 24h, 48h and 72h ALH. NSCs without EdU incorporation were indicated by yellow arrows in e. Yellow arrowheads indicated the cellular extension of NSCs in b, d and e. Scale bars, 10 μm.

Supplementary Figure 6

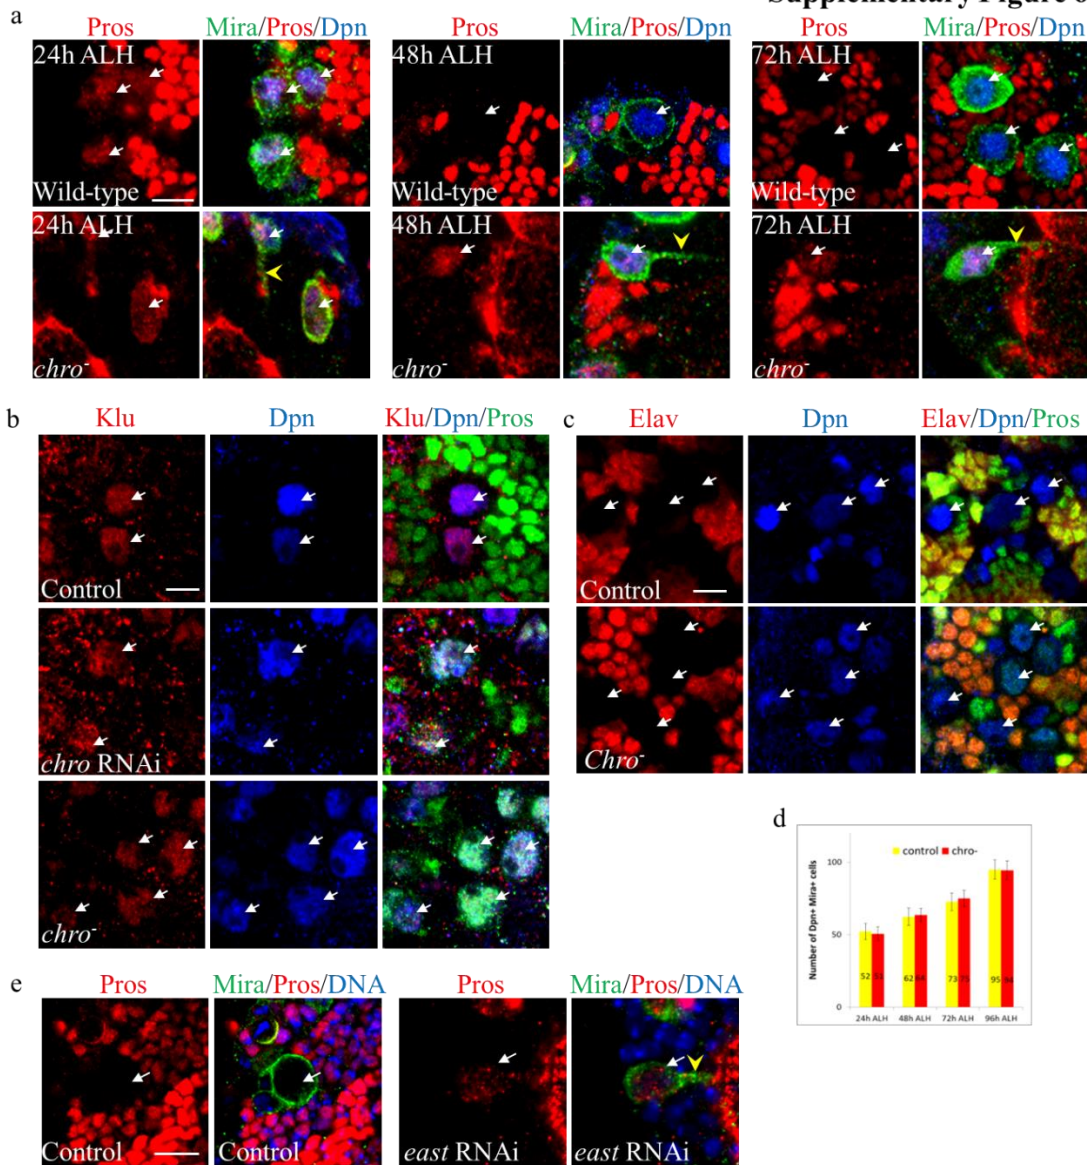

**Supplementary Figure 6. Chro suppresses nuclear Pros in NSCs.** (a) Dpn, Mira and Pros were labelled in wild-type and *chro*<sup>-</sup> mutant larval NSCs at 24h ALH, 48h ALH or 72h ALH. NSCs with nuclear Pros: wild-type, 24h ALH, 64%, n=668; *chro*<sup>-</sup>, 24h ALH, 67%, n=483; wild-type, 48h ALH, 0%, n=577; *chro*<sup>-</sup>, 48h ALH, 77%, n=482; wild-type, 72h ALH, 0%, n=601; *chro*<sup>-</sup>, 72h ALH, 80%, n=625. (b) NSCs in control, *chro* RNAi knockdown and *chro*<sup>-</sup> mutant were labelled with Pros, Klumpfuss (Klu) and Dpn. (c) Pros, Elav and Dpn were labelled in control and *chro*<sup>-</sup> mutant NSCs. (d) Quantification of Dpn<sup>+</sup> Mira<sup>+</sup> cells per central brain hemisphere in control

and *chro*<sup>-</sup> mutant at various time points. Control, 24h ALH, 52±6, n=21; *chro*<sup>-</sup>, 24h ALH, 51±5, n=21; control, 48h ALH, 62±6, n=21; *chro*<sup>-</sup>, 48h ALH, 64±5, n=20; control, 72h ALH, 73±6, n=21; *chro*<sup>-</sup>, 72h ALH, 75±6, n=22; control, 96h ALH, 95±7, n=21; *chro*<sup>-</sup>, 24h ALH, 94±6, n=21. Error bars indicate ± s.d.. (e) Mira, Pros and Topro-3 (for DNA) were labelled for the NSCs in control and *east* RNAi knockdown. White arrows indicated NSCs in a-c, e, arrowheads indicated the cellular extension of NSCs in a, e. Scale bars, 10 µm.

Supplementary Figure 7

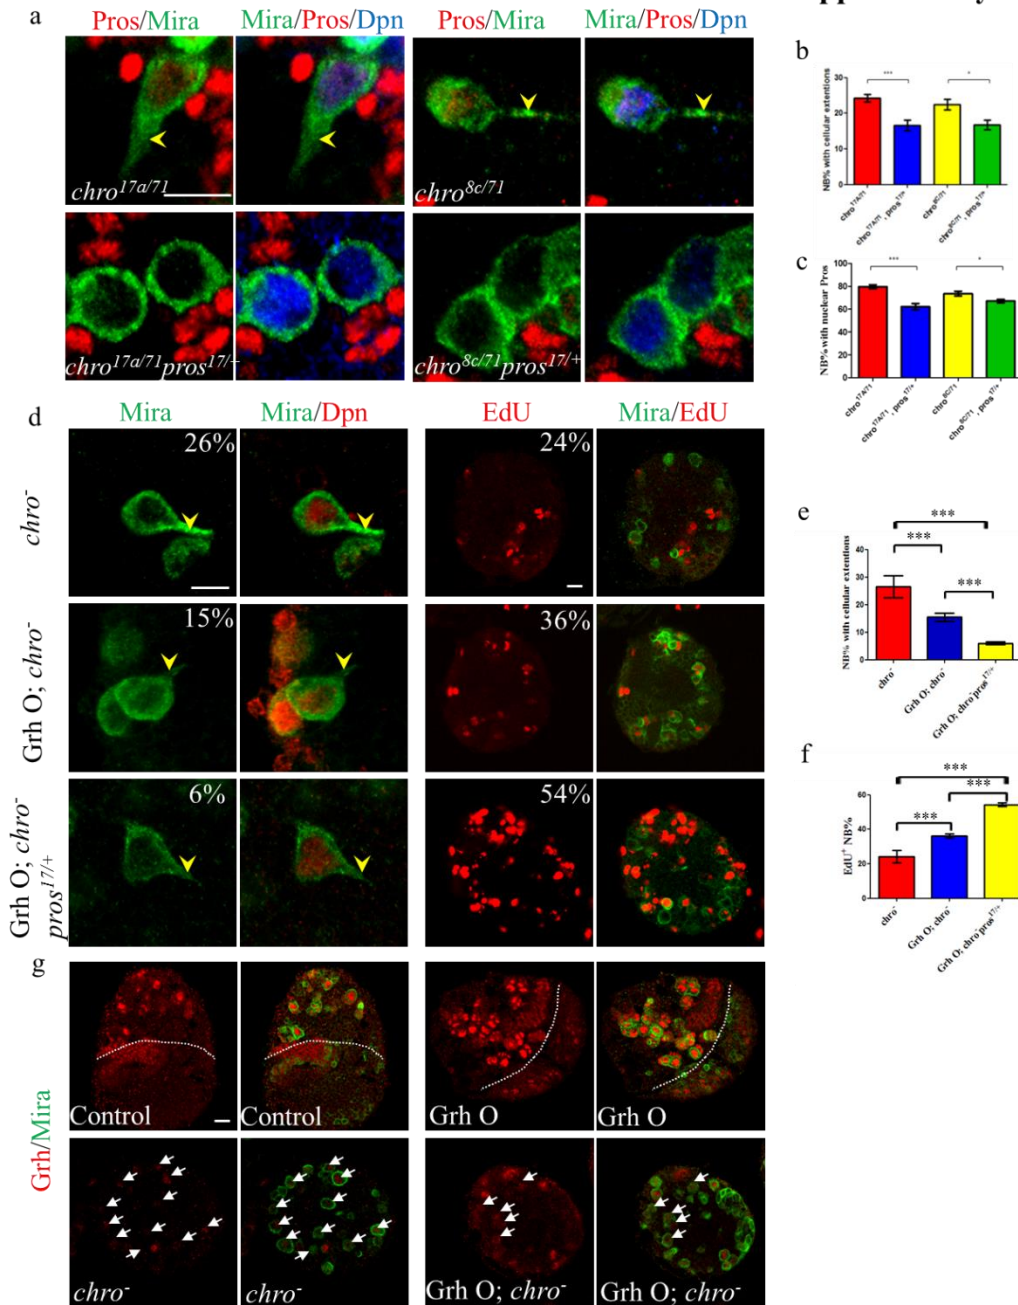

**Supplementary Figure 7. Genetic interactions among *chro*, *grh* and *pros*.** (a) Dpn, Mira and Pros were labelled in NSCs from *chro*<sup>17a/71</sup>, *chro*<sup>17a/71</sup>*pros*<sup>17/+</sup>, *chro*<sup>8c/71</sup> and *chro*<sup>8c/71</sup>*pros*<sup>17/+</sup>. (b-c) Quantification of NSCs with cellular extensions or with nuclear Pros in various genotypes: NSCs with cellular extensions: *chro*<sup>17a/71</sup>, 24%, n=739; *chro*<sup>17a/71</sup>*pros*<sup>17/+</sup>, 17%, n=644; *chro*<sup>8c/71</sup>, 22%, n=683; *chro*<sup>8c/71</sup>*pros*<sup>17/+</sup>, 17%, n=590. NSCs with nuclear Pros: *chro*<sup>17a/71</sup>, 80%, n=867; *chro*<sup>17a/71</sup>

*pros*<sup>17/+</sup>, 62%, n=688; *chro*<sup>8c/71</sup>, 74%, n=806; *chro*<sup>8c/71</sup> *pros*<sup>17/+</sup>, 67%, n=721. **(d)** Mira and Dpn or EdU and Mira were co-labelled in *chro*<sup>-</sup>, *insc*>UAS-Grh O; *chro*<sup>-</sup> (Grh O; *chro*<sup>-</sup>) and *insc*>UAS-Grh O; *chro*<sup>-</sup> *pros*<sup>17/+</sup> (Grh O; *chro*<sup>-</sup> *pros*<sup>17/+</sup>). **(e-f)** Quantification of NSCs with cellular extensions or with EdU incorporation in various genotypes: NSCs with cellular extensions: *chro*<sup>-</sup>, 26%, n=755; Grh O; *chro*<sup>-</sup>, 15%, n=1098; Grh O; *chro*<sup>-</sup> *pros*<sup>17/+</sup>, 7%, n=735; NSCs with EdU incorporation: *chro*<sup>-</sup>, 24%, n=584; Grh O; *chro*<sup>-</sup>, 36%, n=523; Grh O; *chro*<sup>-</sup> *pros*<sup>17/+</sup>, 54%, n=1336. **(g)** Grh and Mira were labelled in larval brains from control, *insc*>UAS-Grh O (Grh O), *chro*<sup>-</sup> and Grh O; *chro*<sup>-</sup>. The central brain is to the left of the white dotted line and white arrows point out those NSCs with very weak Grh in Grh O; *chro*<sup>-</sup> in g. All error bars indicate  $\pm$  s.d. in b-c and e-f. \*\*\* indicates p<0.001 and \* indicates p<0.05 in b, c, e f by student's *t*-test. Arrowheads indicated the cellular extension of NSCs in a, d. Scale bars, 10  $\mu$ m.

**Supplementary Table 1:** Primers used for qPCR and cloning

| Gene/primer name         | Primer sequence (5' to 3')   |
|--------------------------|------------------------------|
| ChIP- <i>CG30158</i>     | F: TCTTCCGTGCTGGTGATT        |
|                          | R: CTAATGAATCAGAGTGAAAAC     |
| ChIP- <i>CR42836</i>     | F: GTCAGATCGCATTTTCTGTAC     |
|                          | R: GACGAAAAGGACGCCATGTTA     |
| ChIP- <i>CR34702</i>     | F: TGGAAGTACAGGCAGAGCCA      |
|                          | R: TGTTATAACTACTTCAGTGCCAAT  |
| ChIP- <i>IM3</i>         | F: GGCACGCCTCTTATGATGGACATT  |
|                          | R: CGCCGAATCAATAAACTGTCATAT  |
| ChIP- <i>Vsx1</i>        | F: TTGACCAAATTCAACTGAATT     |
|                          | R: GCGCTCAATATTCCATTGCTG     |
| ChIP- <i>Vsx1</i> coding | F: AACAAAGCTGCCGCTCGTGGCCAGG |
|                          | R: CGTGGGCGTGGTGAGCATGAT     |
| ChIP- <i>Kr</i>          | F: TTGTATCAGTCGTGATTTGGC     |
|                          | R: CAACAAATTCTTCTTGCTCCTA    |
| ChIP- <i>pdm1</i>        | F: GCTGATGTTTAGTCCGCGCAAAGT  |
|                          | R: AGCCAAGTCAAGATCTATAAAACG  |
| ChIP- <i>grh</i>         | F: GTGAGTAATTGCCACAAAGGGCG   |
|                          | R: ACTCCAGCTGCAACTGACCGCCAT  |
| ChIP- <i>grh-pro</i>     | F: AAGACTTGCAATGATGTAGAAAAG  |
|                          | R: CCTATGGTTGTTGCTATTGCTGTT  |
| ChIP- <i>pros</i> coding | F: CGGCTGCCATGTTCCAGGCGC     |
|                          | R: ATTGCTGTTGCCGCGTTCGA      |
| ChIP- <i>pros</i> pro1   | F: ATCAGCCACAGTTTCAG         |
|                          | R: TTTGCCGACTACTGCGGGCGC     |
| ChIP- <i>pros</i> pro2   | F: AGCACACATCGACAAACCCTTC    |
|                          | R: GTATTGGTGACGTGTGACCGT     |
| ChIP- <i>pros</i> pro3   | F: TTCATTCGCAAGTTTTTCGGG     |
|                          | R: TAAGCCAAAAGGTATCCT        |
| ChIP- <i>pros</i> pro4   | F: TCACACTCCCACCCCACT        |
|                          | R: GAATCTCAAAGTGTGT          |
| ChIP- <i>pros</i> pro5   | F: GAACCTACGGGCTGCA          |
|                          | R: TCTCCACTTGAGCTTATTCTC     |
| ChIP- <i>pros</i> pro6   | F: TTATACAAGAAGTGTCT         |
|                          | R: TTCGATTTCAATTGCGAGTGC     |

FL: full length; F: forward; R: reverse
